# Supplementary material for: Id3 and Bcl6 Promote the Development of Long-Term Immune Memory Induced by Tuberculosis Subunit Vaccine
Source: MDPI journal article supplement (doi:10.3390/vaccines9020126), 2021-02-05
Supplement: s1 [file s1]

**Supplementary information:**
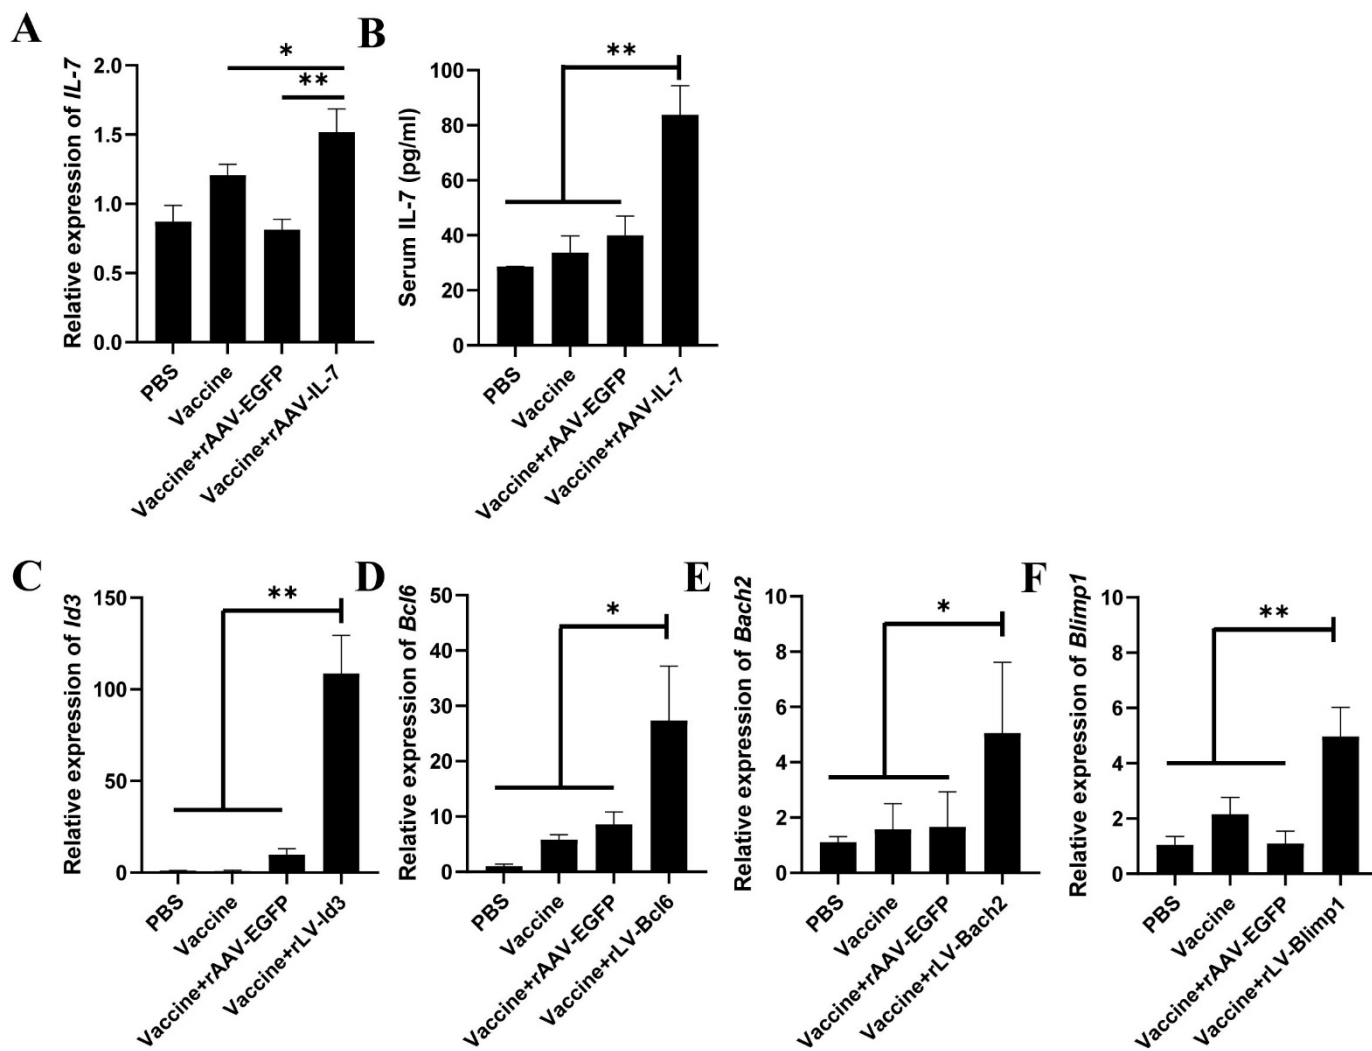

**Figure S1.** Expression of *IL-7*, *Id3*, *Bcl6*, *Bach2* and *Blimp1* in lymph nodes and surrounding soft tissue and the production of *IL-7* in serum. Mice were immunized with the vaccine plus rAAV-EGFP, rAAV-*IL-7* or rLV-EGFP, rLV-*Id3*, rLV-*Bcl6*, rLV-*Bach2*, and rLV-*Blimp1*. The relative expression of *IL-7*, *Id3*, *Bcl6*, *Bach2*, and *Blimp1* was determined on day 5. *IL-7* production in the serum with the additional rAAV-EGFP/rAAV-*IL-7* was detected on day 7. Each group consisted of 3 mice. \* $p < 0.05$ , \*\* $p < 0.01$ .
